# Supplementary material for: The metabolic enzyme hexokinase 2 localizes to the nucleus in AML and normal haematopoietic stem and progenitor cells to maintain stemness
Source: PubMed Central journal article supplement (PMC9203277; doi:10.1038/s41556-022-00925-9), 2022-06-06

# Extended Data Figure 3C

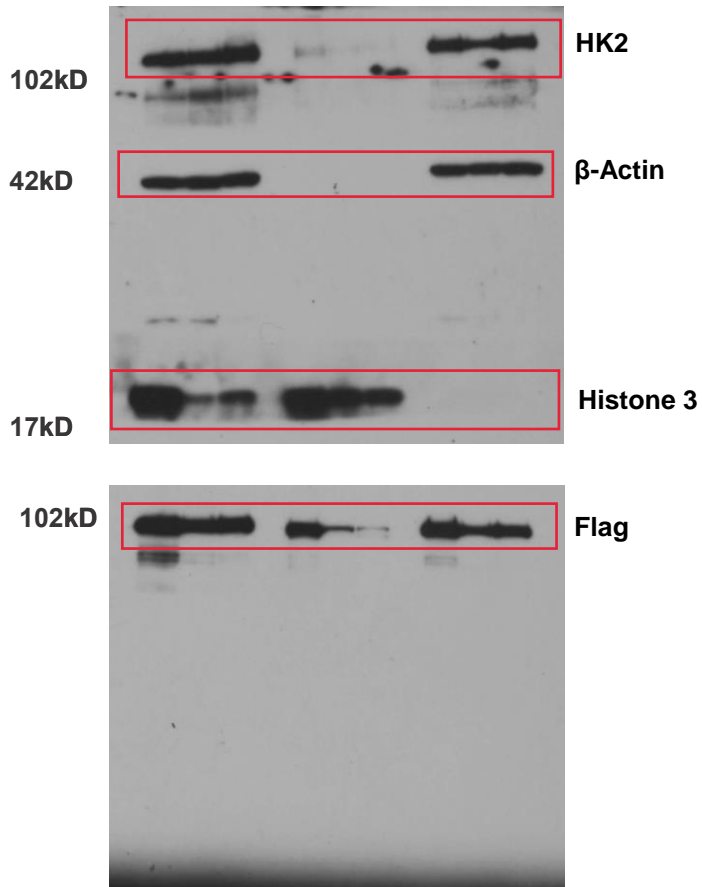

# Extended Data Figure 3D

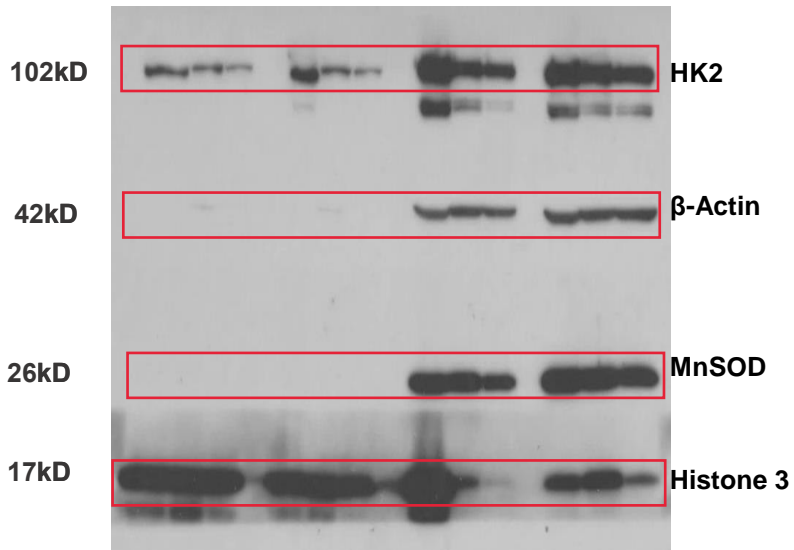

# Extended Data Figure 3K

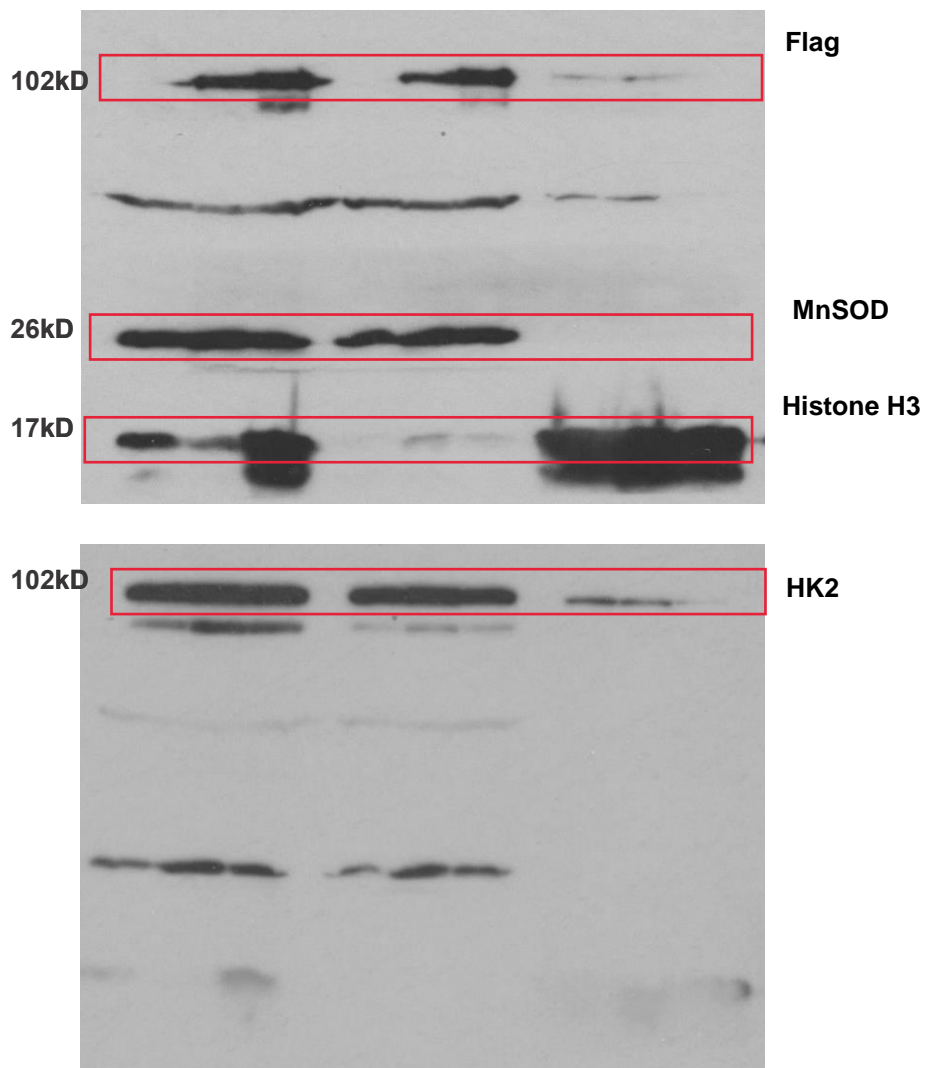

Supplement: 41556_2022_925_MOESM17_ESM.pdf [file 41556_2022_925_MOESM17_ESM.pdf]
